# Supplementary material for: Analyzing Low-Level mtDNA Heteroplasmy—Pitfalls and Challenges from Bench to Benchmarking
Source: MDPI journal article supplement (doi:10.3390/ijms22020935), 2021-01-19
Supplement: s1 [file s1]

**Analyzing low-level mtDNA heteroplasmy –  
pitfalls and challenges from bench to benchmarking**

Fazzini F<sup>1#</sup>, Fendt L<sup>1#</sup>, Schönherr S<sup>1</sup>, Forer L<sup>1</sup>, Streiter G<sup>1</sup>, Schöpf B<sup>1</sup>, Losso JL<sup>1</sup>,  
Kloss-Brandstätter A<sup>1,2</sup>, Kronenberg F<sup>1</sup>, Weissensteiner H<sup>1\*</sup>

<sup>1</sup> *Institute of Genetic Epidemiology, Department of Genetics and Pharmacology, Medical University of  
Innsbruck, A-6020 Innsbruck, Austria*

<sup>2</sup> *Carinthia University of Applied Sciences, A-9524, Villach, Austria*

<sup>#</sup> *These authors contributed equally.*

<sup>\*</sup> *Corresponding author: hansj.weissensteiner@i-med.ac.at*

**Supplementary Table S1.** Averaged mixture level, standard deviation and coefficient of variation from all experiments down to 1:100. Polymerases (CLAA (Clontech), HERK and NEB). Tot DNA and PCR prod refer to the DNA extraction method, either starting from total DNA or PCR products respectively.

|             | <b>M1 (1:2)</b>  |             |            |                 |             |            | <b>M2 (1:10)</b>  |             |            |                 |             |            |
|-------------|------------------|-------------|------------|-----------------|-------------|------------|-------------------|-------------|------------|-----------------|-------------|------------|
|             | <b>Tot DNA</b>   |             |            | <b>PCR prod</b> |             |            | <b>Tot DNA</b>    |             |            | <b>PCR prod</b> |             |            |
|             | <b>CLAA</b>      | <b>HERK</b> | <b>NEB</b> | <b>CLAA</b>     | <b>HERK</b> | <b>NEB</b> | <b>CLAA</b>       | <b>HERK</b> | <b>NEB</b> | <b>CLAA</b>     | <b>HERK</b> | <b>NEB</b> |
| <b>mean</b> | 0.513            | 0.511       | 0.526      | 0.482           | 0.475       | 0.485      | 0.108             | 0.103       | 0.107      | 0.088           | 0.081       | 0.103      |
| <b>SD</b>   | 0.032            | 0.036       | 0.032      | 0.036           | 0.030       | 0.035      | 0.011             | 0.013       | 0.012      | 0.010           | 0.011       | 0.012      |
| <b>CV%</b>  | 6.2%             | 7.0%        | 6.1%       | 7.5%            | 6.3%        | 7.3%       | 9.8%              | 12.2%       | 11.1%      | 11.5%           | 13.5%       | 11.6%      |
|             | <b>M3 (1:50)</b> |             |            |                 |             |            | <b>M4 (1:100)</b> |             |            |                 |             |            |
|             | <b>Tot DNA</b>   |             |            | <b>PCR prod</b> |             |            | <b>Tot DNA</b>    |             |            | <b>PCR prod</b> |             |            |
|             | <b>CLAA</b>      | <b>HERK</b> | <b>NEB</b> | <b>CLAA</b>     | <b>HERK</b> | <b>NEB</b> | <b>CLAA</b>       | <b>HERK</b> | <b>NEB</b> | <b>CLAA</b>     | <b>HERK</b> | <b>NEB</b> |
| <b>mean</b> | 0.022            | 0.021       | 0.023      | 0.018           | 0.017       | 0.020      | 0.012             | 0.011       | 0.013      | 0.012           | 0.010       | 0.011      |
| <b>SD</b>   | 0.002            | 0.002       | 0.003      | 0.003           | 0.004       | 0.003      | 0.001             | 0.001       | 0.002      | 0.003           | 0.001       | 0.002      |
| <b>CV%</b>  | 11.4%            | 8.4%        | 13.1%      | 18.5%           | 21.9%       | 16.7%      | 11.5%             | 12.6%       | 14.1%      | 21.7%           | 7.4%        | 15.6%      |

**Supplementary Table S2.** Low-level variants detected of the three polymerases (Clontech, Herk (Herculase) and NEB) in four different mixtures M1-M4 based on mutserve analysis (1% threshold for variant detection). See Suppl.Table 3 for details about coverage.

| M1              | M1-<br>Clontech_S<br>18 | M1-<br>Clontech_<br>S6 | M1-<br>Herk_<br>S1  | M1-<br>Herk_<br>S12 | M1-<br>NEB_S<br>21 | M1-<br>NEB_<br>S46 | M1-PCR-<br>Clontech_<br>S16 | M1-PCR-<br>Herk_S1<br>1 | M1-PCR-<br>NEB_S2<br>6 |
|-----------------|-------------------------|------------------------|---------------------|---------------------|--------------------|--------------------|-----------------------------|-------------------------|------------------------|
| found out of 34 | 34                      | 34                     | 34                  | 34                  | 34                 | 34                 | 34                          | 34                      | 34                     |
| ignore list     | 4                       | 3                      | 3                   | 3                   | 4                  | 4                  | 3                           | 3                       | 4                      |
| falsPositive    | 4                       | 19                     | 0                   | 0                   | 22                 | 4                  | 22                          | 0                       | 8                      |
| falseNegative   | 0                       | 0                      | 0                   | 0                   | 0                  | 0                  | 0                           | 0                       | 0                      |
| trueNegative    | 16527                   | 16513                  | 16532               | 16532               | 16509              | 16527              | 16510                       | 16532                   | 16523                  |
| M2              | M2-<br>Clontech_S<br>19 | M2-<br>Clontech_<br>S7 | M2-<br>Herk_<br>S13 | M2-<br>Herk_<br>S2  | M2-<br>NEB_S<br>22 | M2-<br>NEB_<br>S47 | M2-PCR-<br>Clontech_<br>S17 | M2-PCR-<br>Herk_S1<br>2 | M2-PCR-<br>NEB_S2<br>7 |
| found out of 36 | 35                      | 36                     | 34                  | 34                  | 35                 | 35                 | 36                          | 36                      | 36                     |
| ignore list     | 4                       | 6                      | 4                   | 3                   | 7                  | 4                  | 7                           | 3                       | 6                      |
| falsPositive    | 5                       | 15                     | 1                   | 0                   | 16                 | 3                  | 18                          | 0                       | 12                     |
| falseNegative   | 1                       | 0                      | 2                   | 2                   | 1                  | 1                  | 0                           | 0                       | 0                      |
| trueNegative    | 16525                   | 16512                  | 16530               | 16532               | 16511              | 16527              | 16508                       | 16530                   | 16515                  |
| M3              | M3-<br>Clontech_S<br>20 | M3-<br>Clontech_<br>S8 | M3-<br>Herk_<br>S14 | M3-<br>Herk_<br>S3  | M3-<br>NEB_S<br>23 | M3-<br>NEB_<br>S48 | M3-PCR-<br>Clontech_<br>S18 | M3-PCR-<br>Herk_S1<br>3 | M3-PCR-<br>NEB_S2<br>8 |
| found out of 36 | 36                      | 36                     | 36                  | 35                  | 35                 | 35                 | 36                          | 36                      | 36                     |
| ignore list     | 5                       | 8                      | 3                   | 3                   | 6                  | 5                  | 5                           | 3                       | 6                      |
| falsPositive    | 3                       | 22                     | 2                   | 0                   | 8                  | 0                  | 30                          | 0                       | 14                     |
| falseNegative   | 0                       | 0                      | 0                   | 1                   | 1                  | 1                  | 0                           | 0                       | 0                      |
| trueNegative    | 16525                   | 16503                  | 16528               | 16531               | 16520              | 16529              | 16498                       | 16530                   | 16513                  |
| M4              | M4-<br>Clontech_S<br>21 | M4-<br>Clontech_<br>S9 | M4-<br>Herk_<br>S15 | M4-<br>Herk_<br>S4  | M4-<br>NEB_S<br>24 | M4-<br>NEB_<br>S49 | M4-PCR-<br>Clontech_<br>S19 | M4-PCR-<br>Herk_S1<br>4 | M4-PCR-<br>NEB_S2<br>9 |
| found out of 36 | 35                      | 30                     | 26                  | 29                  | 33                 | 34                 | 27                          | 28                      | 29                     |
| ignore list     | 7                       | 6                      | 3                   | 3                   | 8                  | 7                  | 5                           | 3                       | 8                      |
| falsPositive    | 4                       | 18                     | 1                   | 0                   | 13                 | 1                  | 20                          | 0                       | 9                      |
| falseNegative   | 1                       | 6                      | 10                  | 7                   | 3                  | 2                  | 9                           | 8                       | 7                      |
| trueNegative    | 16523                   | 16515                  | 16539               | 16537               | 16515              | 16527              | 16517                       | 16538                   | 16523                  |

**Supplementary Table S3.** List of all the 48 samples with mean and median coverage. Performance (F1 score) shows the median score for the 2 main analyses (impact of preprocessing at the 1% level) and low-level variant

| Sample ID           | Mixture | Enzyme   | Mixing Source | Mean Coverage | Median Coverage | F1 Score* 1% | F1 Score# 0.4% |
|---------------------|---------|----------|---------------|---------------|-----------------|--------------|----------------|
| H1-Clontech_S23     | 1       | Clontech | totDNAext     | 23527         | 25586           |              |                |
| H1-Herk_S17         | 1       | Hercules | totDNAext     | 11956         | 12906           |              |                |
| H1-NEB_S64          | 1       | NEB      | totDNAext     | 4304          | 4607            |              |                |
| M1-Clontech_S18     | 1:2     | Clontech | totDNAext     | 24910         | 26475           | 0.94         |                |
| M1-Clontech_S6      | 1:2     | Clontech | totDNAext     | 5625          | 5862            | 0.77         |                |
| M1-Herk_S1          | 1:2     | Hercules | totDNAext     | 6833          | 7033            | 1.00         |                |
| M1-Herk_S12         | 1:2     | Hercules | totDNAext     | 13537         | 14300           | 1.00         |                |
| M1-NEB_S21          | 1:2     | NEB      | totDNAext     | 4206          | 4421            | 0.77         |                |
| M1-NEB_S46          | 1:2     | NEB      | totDNAext     | 6201          | 6568            | 0.94         |                |
| M1-PCR-Clontech_S16 | 1:2     | Clontech | PCRprod       | 5159          | 5524            | 0.77         |                |
| M1-PCR-Herk_S11     | 1:2     | Hercules | PCRprod       | 7322          | 7745            | 1.00         |                |
| M1-PCR-NEB_S26      | 1:2     | NEB      | PCRprod       | 5385          | 5729            | 0.91         |                |
| M2-Clontech_S19     | 1:10    | Clontech | totDNAext     | 31371         | 32408           | 0.95         |                |
| M2-Clontech_S7      | 1:10    | Clontech | totDNAext     | 6379          | 6828            | 0.82         |                |
| M2-Herk_S13         | 1:10    | Hercules | totDNAext     | 16373         | 17349           | 0.96         |                |
| M2-Herk_S2          | 1:10    | Hercules | totDNAext     | 5415          | 5630            | 0.97         |                |
| M2-NEB_S22          | 1:10    | NEB      | totDNAext     | 5854          | 6316            | 0.80         |                |
| M2-NEB_S47          | 1:10    | NEB      | totDNAext     | 5673          | 5880            | 0.95         |                |
| M2-PCR-Clontech_S17 | 1:10    | Clontech | PCRprod       | 5169          | 5286            | 0.80         |                |
| M2-PCR-Herk_S12     | 1:10    | Hercules | PCRprod       | 6061          | 6281            | 0.99         |                |
| M2-PCR-NEB_S27      | 1:10    | NEB      | PCRprod       | 6633          | 7112            | 0.86         |                |
| M3-Clontech_S20     | 1:50    | Clontech | totDNAext     | 33925         | 33740           | 0.96         |                |
| M3-Clontech_S8      | 1:50    | Clontech | totDNAext     | 4753          | 5140            | 0.77         |                |
| M3-Herk_S14         | 1:50    | Hercules | totDNAext     | 15661         | 15951           | 0.99         |                |
| M3-Herk_S3          | 1:50    | Hercules | totDNAext     | 6883          | 7217            | 0.99         |                |
| M3-NEB_S23          | 1:50    | NEB      | totDNAext     | 5910          | 6435            | 0.90         |                |
| M3-NEB_S48          | 1:50    | NEB      | totDNAext     | 7615          | 7935            | 0.99         |                |
| M3-PCR-Clontech_S18 | 1:50    | Clontech | PCRprod       | 4125          | 4359            | 0.71         |                |
| M3-PCR-Herk_S13     | 1:50    | Hercules | PCRprod       | 5719          | 5913            | 1.00         |                |
| M3-PCR-NEB_S28      | 1:50    | NEB      | PCRprod       | 5409          | 5641            | 0.84         |                |

|                                                                                                            |       |               |           |       |       |      |      |
|------------------------------------------------------------------------------------------------------------|-------|---------------|-----------|-------|-------|------|------|
| <b>M4-Clontech_S21</b>                                                                                     | 1:100 | Clontech      | totDNAext | 29209 | 30070 | 0.92 |      |
| <b>M4-Clontech_S9</b>                                                                                      | 1:100 | Clontech      | totDNAext | 5078  | 5295  | 0.71 | 0.06 |
| <b>M4-Herk_S15</b>                                                                                         | 1:100 | Hercula<br>se | totDNAext | 9521  | 10024 | 0.81 |      |
| <b>M4-Herk_S4</b>                                                                                          | 1:100 | Hercula<br>se | totDNAext | 5434  | 5607  | 0.89 | 0.84 |
| <b>M4-NEB_S24</b>                                                                                          | 1:100 | NEB           | totDNAext | 4473  | 4795  | 0.78 |      |
| <b>M4-NEB_S49</b>                                                                                          | 1:100 | NEB           | totDNAext | 6712  | 6965  | 0.96 | 0.07 |
| <b>M4-PCR-Clontech_S19</b>                                                                                 | 1:100 | Clontech      | PCRprod   | 5518  | 5729  | 0.64 | 0.07 |
| <b>M4-PCR-Herk_S14</b>                                                                                     | 1:100 | Hercula<br>se | PCRprod   | 5830  | 6204  | 0.88 | 0.80 |
| <b>M4-PCR-NEB_S29</b>                                                                                      | 1:100 | NEB           | PCRprod   | 5154  | 5295  | 0.78 | 0.08 |
| <b>M5-Clontech_S10</b>                                                                                     | 1:200 | Clontech      | totDNAext | 5825  | 6299  |      | 0.06 |
| <b>M5-Herk_S5</b>                                                                                          | 1:200 | Hercula<br>se | totDNAext | 5128  | 5259  |      | 0.43 |
| <b>M5-NEB_S25</b>                                                                                          | 1:200 | NEB           | totDNAext | 4142  | 4229  |      | 0.06 |
| <b>M5-PCR-Clontech_S20</b>                                                                                 | 1:200 | Clontech      | PCRprod   | 3859  | 3188  |      | 0.06 |
| <b>M5-PCR-Herk_S15</b>                                                                                     | 1:200 | Hercula<br>se | PCRprod   | 6039  | 6751  |      | 0.72 |
| <b>M5-PCR-NEB_S30</b>                                                                                      | 1:200 | NEB           | PCRprod   | 5209  | 5744  |      | 0.08 |
| <b>U5-Clontech_S22</b>                                                                                     | 1     | Clontech      | totDNAext | 20390 | 21491 |      |      |
| <b>U5-Herk_S16</b>                                                                                         | 1     | Hercula<br>se | totDNAext | 6539  | 6896  |      |      |
| <b>U5-NEB_S75</b>                                                                                          | 1     | NEB           | totDNAext | 2651  | 2751  |      |      |
| * median over all preprocessing steps (fastp, MarkDuplicates, none); # median over all the variant callers |       |               |           |       |       |      |      |

**Supplementary Table S4.** Performance of the six variant callers. Sens.=Sensitivity, Spec.=Specificity and Prec. = Precision. CLAA (Clontech), HERK (Herculase) and NEB (NEB Taq).

|                 |                  | M4   |             |      |            |      |             | M5   |             |      |            |      |             |
|-----------------|------------------|------|-------------|------|------------|------|-------------|------|-------------|------|------------|------|-------------|
| Perform<br>ance | Tool             | CLAA | CLAA<br>PCR | NEB  | NEB<br>PCR | HERK | HERK<br>PCR | CLAA | CLAA<br>PCR | NEB  | NEB<br>PCR | HERK | HERK<br>PCR |
| Sens.           | <b>LOFREQ</b>    | 0.94 | 0.86        | 0.97 | 0.92       | 0.89 | 0.94        | 0.64 | 0.50        | 0.61 | 0.64       | 0.47 | 0.39        |
| Spec.           | <b>LOFREQ</b>    | 0.96 | 0.96        | 0.93 | 0.97       | 0.99 | 0.99        | 0.95 | 0.97        | 0.97 | 0.97       | 0.99 | 0.99        |
| Prec.           | <b>LOFREQ</b>    | 0.05 | 0.04        | 0.03 | 0.06       | 0.14 | 0.16        | 0.03 | 0.03        | 0.05 | 0.04       | 0.08 | 0.07        |
| Sens.           | <b>GATK</b>      | 0.42 | 0.42        | 0.81 | 0.50       | 0.39 | 0.39        | 0.31 | 0.39        | 0.36 | 0.36       | 0.36 | 0.42        |
| Spec.           | <b>GATK</b>      | 0.98 | 0.98        | 0.93 | 0.98       | 1.00 | 1.00        | 0.98 | 0.98        | 0.98 | 0.98       | 1.00 | 1.00        |
| Prec.           | <b>GATK</b>      | 0.04 | 0.04        | 0.03 | 0.04       | 0.23 | 0.24        | 0.04 | 0.04        | 0.04 | 0.04       | 0.19 | 0.23        |
| Sens.           | <b>FREEBAYES</b> | 1.00 | 0.97        | 1.00 | 1.00       | 1.00 | 1.00        | 0.83 | 0.92        | 0.89 | 1.00       | 0.81 | 0.44        |
| Spec.           | <b>FREEBAYES</b> | 0.92 | 0.94        | 0.96 | 0.95       | 1.00 | 1.00        | 0.93 | 0.93        | 0.94 | 0.95       | 1.00 | 1.00        |
| Prec.           | <b>FREEBAYES</b> | 0.03 | 0.03        | 0.05 | 0.04       | 0.62 | 0.65        | 0.03 | 0.03        | 0.03 | 0.04       | 0.59 | 0.39        |
| Sens.           | <b>MUTSERVE</b>  | 1.00 | 1.00        | 1.00 | 1.00       | 1.00 | 1.00        | 0.92 | 0.97        | 0.92 | 1.00       | 0.94 | 0.67        |
| Spec.           | <b>MUTSERVE</b>  | 0.89 | 0.90        | 0.92 | 0.90       | 1.00 | 1.00        | 0.90 | 0.89        | 0.89 | 0.91       | 1.00 | 1.00        |

|       |                 |      |      |      |      |      |      |      |      |      |      |      |      |
|-------|-----------------|------|------|------|------|------|------|------|------|------|------|------|------|
| Prec. | <b>MUTSERVE</b> | 0.02 | 0.02 | 0.03 | 0.02 | 0.88 | 0.90 | 0.02 | 0.02 | 0.02 | 0.02 | 0.83 | 0.77 |
| Sens. | <b>VARSCAN</b>  | 1.00 | 1.00 | 1.00 | 0.97 | 0.97 | 0.97 | 0.86 | 0.75 | 0.81 | 1.00 | 0.83 | 0.39 |
| Spec. | <b>VARSCAN</b>  | 0.92 | 0.93 | 0.96 | 0.95 | 1.00 | 1.00 | 0.93 | 0.94 | 0.94 | 0.95 | 1.00 | 1.00 |
| Prec. | <b>VARSCAN</b>  | 0.03 | 0.03 | 0.05 | 0.04 | 0.73 | 0.83 | 0.03 | 0.03 | 0.03 | 0.04 | 0.71 | 0.54 |
| Sens. | <b>VARDICT</b>  | 0.97 | 0.83 | 1.00 | 0.89 | 0.86 | 0.97 | 0.67 | 0.72 | 0.67 | 0.81 | 0.69 | 0.56 |
| Spec. | <b>VARDICT</b>  | 0.94 | 0.95 | 0.95 | 0.96 | 1.00 | 1.00 | 0.95 | 0.94 | 0.95 | 0.96 | 1.00 | 1.00 |
| Prec. | <b>VARDICT</b>  | 0.03 | 0.04 | 0.04 | 0.04 | 0.94 | 0.97 | 0.03 | 0.03 | 0.03 | 0.04 | 0.89 | 0.83 |

Sens= sensitivity; Spec=specificity; Prec. = precision.

**Supplementary Table S5.** a) False Negatives and b) false positive variants detected. Six different variant callers applied on several mixtures of M4 (1% mixture) and M5 (0.5% mixture), for 2 different DNA extraction methods (total DNA as well starting from PCR-mixtures (PCR-prefix)), for the 3 different polymerases. CLAA (Clontech), HERK (Herculase) and NEB (NEB Taq), FN=false negatives, FP=false positives)

|                           | M4   |      |      |          |          |         | M5   |      |      |          |          |         | TOTAL |      |      | MEANS        |             |              |
|---------------------------|------|------|------|----------|----------|---------|------|------|------|----------|----------|---------|-------|------|------|--------------|-------------|--------------|
|                           | CLAA | HERK | NEB  | PCR-CLAA | PCR-HERK | PCR-NEB | CLAA | HERK | NEB  | PCR-CLAA | PCR-HERK | PCR-NEB | CLAA  | HERK | NEB  | FN / CLAA    | FN / HERK   | FN / NEB     |
| <b>a) FALSE NEGATIVES</b> |      |      |      |          |          |         |      |      |      |          |          |         |       |      |      |              |             |              |
| <b>LOFREQ</b>             | 2    | 2    | 1    | 5        | 4        | 3       | 13   | 22   | 14   | 18       | 19       | 13      | 38    | 47   | 31   | 9.5          | 11.75       | 7.75         |
| <b>GATK</b>               | 21   | 22   | 7    | 21       | 22       | 18      | 25   | 21   | 23   | 22       | 23       | 23      | 89    | 88   | 71   | 22.25        | 22          | 17.75        |
| <b>FREEBAYES</b>          | 0    | 0    | 0    | 1        | 0        | 0       | 6    | 20   | 4    | 3        | 7        | 0       | 10    | 27   | 4    | 2.5          | 6.75        | 1            |
| <b>MUTSERVE</b>           | 0    | 0    | 0    | 0        | 0        | 0       | 3    | 12   | 3    | 1        | 2        | 0       | 4     | 14   | 3    | 1            | 3.5         | 0.75         |
| <b>VARSCAN</b>            | 0    | 1    | 0    | 0        | 1        | 1       | 5    | 22   | 7    | 9        | 6        | 0       | 14    | 30   | 8    | 3.5          | 7.5         | 2            |
| <b>VARDICT</b>            | 1    | 1    | 0    | 6        | 5        | 4       | 12   | 16   | 12   | 10       | 11       | 7       | 29    | 33   | 23   | 7.25         | 8.25        | 5.75         |
|                           |      |      |      |          |          |         |      |      |      |          |          |         |       |      |      | <b>7.7</b>   | <b>10.0</b> | <b>5.8</b>   |
|                           |      |      |      |          |          |         |      |      |      |          |          |         |       |      |      |              |             |              |
|                           | M4   |      |      |          |          |         | M5   |      |      |          |          |         | TOTAL |      |      | MEANS        |             |              |
|                           | CLAA | HERK | NEB  | PCR-CLAA | PCR-HERK | PCR-NEB | CLAA | HERK | NEB  | PCR-CLAA | PCR-HERK | PCR-NEB | CLAA  | HERK | NEB  | FP / CLAA    | FP / HERK   | FP / NEB     |
| <b>b) FALSE POSITIVES</b> |      |      |      |          |          |         |      |      |      |          |          |         |       |      |      |              |             |              |
| <b>LOFREQ</b>             | 640  | 173  | 1088 | 660      | 193      | 477     | 830  | 197  | 453  | 545      | 208      | 509     | 2675  | 771  | 2527 | 668.8        | 192.8       | 631.8        |
| <b>GATK</b>               | 365  | 44   | 1079 | 397      | 46       | 410     | 252  | 49   | 328  | 351      | 55       | 349     | 1365  | 194  | 2166 | 341.3        | 48.5        | 541.5        |
| <b>FREEBAYES</b>          | 1281 | 19   | 722  | 1062     | 22       | 852     | 1108 | 25   | 952  | 1195     | 20       | 819     | 4646  | 86   | 3345 | 1161.5       | 21.5        | 836.3        |
| <b>MUTSERVE</b>           | 1867 | 4    | 1370 | 1712     | 5        | 1614    | 1691 | 7    | 1769 | 1847     | 7        | 1567    | 7117  | 23   | 6320 | 1779.3       | 5.8         | 1580.0       |
| <b>VARSCAN</b>            | 1262 | 7    | 686  | 1095     | 13       | 876     | 1139 | 12   | 958  | 1032     | 12       | 867     | 4528  | 44   | 3387 | 1132.0       | 11.0        | 846.8        |
| <b>VARDICT</b>            | 1070 | 1    | 829  | 773      | 2        | 706     | 826  | 4    | 821  | 925      | 3        | 734     | 3594  | 10   | 3090 | 898.5        | 2.5         | 772.5        |
|                           |      |      |      |          |          |         |      |      |      |          |          |         |       |      |      | <b>996.9</b> | <b>47.0</b> | <b>868.1</b> |

## Supplementary Methods

### Analysis of mixtures M1-M4 with mutserve (v.1.3.4)

Based on an average per base coverage of approximately ~8,900x for Q20 data, the sensitivity for detection of minor mixture components most prominently showed alignment-issues around sites 151 and 152. Since mtDNA-Server applies the per Base Alignment Quality (BAQ)<sup>8</sup> as alternative to realignment, these 2 SNPs mostly get filtered out by falsely interpreted as misalignment. Therefore BAQ was disabled. Further indels around homopolymeric C-stretches were filtered so that we ignored positions around homopolymeric stretches 302-309 and 311-15, around the AC repeat at position 523-524 and around 3107 due to the N on the reference sequence, resulting in issues for some variant caller. Also private low-level mutations were ignored in the analysis, if present at ~1% in the source sample. For all mixtures the threshold for heteroplasmic detection was set to 1% variant allele frequency. Here most prominently the sensitivity differed depending on the polymerase used. Single false positive mutations did not exceed levels of 1.2% in each mixture type, except for variant on position 3210 with up to 8.6% (classified as phantom mutation, as found only in NEB mixtures M1-M4, but not in NEB source samples H1 and U5). All 48 samples were processed via 3 workflows:

1. **default:** FASTQ -> BWA MEM -> SAMTOOLS -> BAM -> Picard-Tools AddOrReplaceReadGroups -> mutserve v.1.3.4
2. **fastp:** FASTQ -> FASTP -> BWA MEM -> SAMTOOLS -> BAM -> Picard-Tools AddOrReplaceReadGroups -> mutserve v.1.3.4
3. **markdup:** final BAM from 1.default -> Picard-Tools MarkDuplicates -> BAM -> mutserve v.1.3.4

The parameters for mutserve: `java -jar -Xmx8G mutserve-1.3.4.jar analyse-local --input BAM_folder --output mutserve1.3.4_0.01.vcf --level 0.01 --noBaQ --reference reference/rcrs.fasta`

### Comparative data analysis for Mixtures M4 and M5

In order to compare all variant callers for their low-level variant calling performance, the paired FASTQ files for all mixtures M4 and M5 were aligned/mapped to the mitochondrial reference sequence rCRS with BWA-MEM<sup>10</sup> version 0.7.15-r1140 and the BAM files generated, sorted and indexed by samtools v.1.10, without pre-processing steps (i.e. no fastp and no duplication removal). Supplementary Table 2 lists all variant callers employed with URL to source code, Version, information, as well as the programming language. All variant callers were installed and run on a Linux Instance with CentOS 7.8.2003 from April 2020 on an Intel(R) Xeon(R) CPU E5-2640 v4 @ 2.40GHz with 8 Cores and 32GB RAM. Total Sample size was 870 MB with a mean and



median sample coverage (based on mutserve) of 5,855 and 5,865 over all 16569 positions in all 12 mixtures.

**Supplementary Table S6.** List of all variant callers employed with URL to source code / binaries, version, programming language and wall time needed for the analysis of one sample on an CentOS machine with Intel Xeon CPU E5-2640 v4 @ 2.40GHz and 32 GB RAM.

| TOOL             | URL                                                                                                         | Latest Version<br>(release Date) | Progr.<br>Language | Time per<br>sample |
|------------------|-------------------------------------------------------------------------------------------------------------|----------------------------------|--------------------|--------------------|
| <i>freebayes</i> | <a href="https://github.com/ekg/freebayes">https://github.com/ekg/freebayes</a>                             | 1.3.2<br>(December 2019)         | C++                | 04:37 sec          |
| GATK4<br>mutect2 | <a href="https://github.com/broadinstitute/gatk">https://github.com/broadinstitute/gatk</a>                 | 4.1.8.1<br>(July 2020)           | Java /<br>Python   | 05:16 sec          |
| LoFreq*          | <a href="https://github.com/CSB5/lofreq">https://github.com/CSB5/lofreq</a>                                 | 2.1.5<br>(June 2020)             | C / Python         | 01:43 sec          |
| mutserve         | <a href="https://github.com/seppinho/mutserve">https://github.com/seppinho/mutserve</a>                     | 1.3.4<br>(May 2020)              | Java               | 00:35 sec          |
| VarDictJava      | <a href="https://github.com/AstraZeneca-NGS/VarDictJava">https://github.com/AstraZeneca-NGS/VarDictJava</a> | 1.7.0<br>(October 2019)          | Java / Shell       | 02:41 sec          |
| Varscan          | <a href="https://github.com/dkoboldt/varsan">https://github.com/dkoboldt/varsan</a>                         | 2.4.4 (July 2019)                | Java               | 00:44 sec          |

- **freebayes:** freebayes is a Bayesian haplotype-based generic variant detector for NGS data, not limited to SNPs, but also able to detect insertions and deletions as well as shorter structural variants like multinucleotide polymorphisms and complex events, being very popular (over 1,500 citations on Google Scholar as of August, 2020). We used the precompiled version 1.3.1, as 1.3.2 ensures compatibility with Python 3, but otherwise very similar to 1.3.1. We run freebayes by looping over all M4 and M5 BAM files with the parameter as below, with a runtime per sample ~

```
for i in *; do

freebayes-v1.3.1 -f reference/rcrs.fasta -b $i --min-mapping-
quality 30 --min-base-quality 30 --min-alternate-fraction 0.004 -
-min-alternate-count 5 --ploidy 2 --region rCRS:1-16569 >
"$i".freebayes.vcf;

done
```

- **GATK4 Mutect2:** GATK is very popular, and with over 7,600 citations (August, 2020) the most cited of all variant callers in this validation. It comes with a large selection of useful tools for managing NGS data and even enables the creation of own pipelines. With one of the later versions, GATK4's Mutect2 has an mitochondrial DNA calling mode

included. We ran it over all BAM files M4 and M5 (total 12 samples) with the following parameters:

```
for i in *; do
gatk Mutect2 -R reference/rcrs.fasta -L rCRS --min-base-quality-
score 30 --mitochondria-mode -I $i -O "$i".gatk.vcf;
done
```

- **LoFreq:** LoFreq takes the sequence quality into consideration, when performing the ultra-sensitive variant calling. It can be used for SNP and indel calling, and quality measures into considerations, and can be used as a generic variant caller. Already the first version of LoFreq (cited over 500 times as of August 2020) was evaluated with mitochondrial genomes. Here we run the latest version LoFreq 2.1.5 over all samples:

```
for i in *; do
lofreq call -f reference/rcrs.fasta -o "$i"_lofreq.vcf -B $i --
minimum-mapping-quality 30
done
```

- **mutserve:** mutserve is the updated core of mtDNA-Server (cited over 70x, as of August 2020 on Google Scholar) which was designed specifically for the human mitochondrial genome in the first versions. This changed with the last versions, so that it can also be applied to different reference sequences. The detailed list of internal parameters can be found in the manuscript as well as on the mtDNA-Server help page (<https://mtdna-server.uibk.ac.at/index.html#!pages/help>). We ran mutserve with the parameters as follows, as it is one of the few variant caller also allowing to use it on folders containing the BAM/CRAM files (here assuming M4M5bamFolder contains all mixtures):

```
java -jar -Xmx8G mutserve-1.3.4.jar analyse-local --input
M4M5bamFolder --output mutserve1.3.4_0.004.vcf --level 0.004 --
noBaq --reference reference/rcrs.fasta --baseQ 30
```

- **VarDict** Similar to LoFreq, Vardict (cited ~280x) was designed to accurately detect variants in next-generation sequencing (NGS) data focusing on cancer genomes. It is able to call single as well as multiple nucleotide variants, indels (insertion and deletions) as well as more complex structural variants<sup>3</sup>. It comes with its own deduplication step, allows for detection of PCR artefacts and performs local realignments. For the validation within this

project, the JAVA version of VarDict was applied on the sorted BAM files, with the allele frequency threshold of 0.4%.

```
AF_THR=0.004
for i in *; do
bedtools bamtobed -i $i > "$i".bed;

java -jar VarDictJava/build/libs/VarDict-1.7.0.jar -G
reference/rcrs.fasta -f $AF_THR -N $i -q 30 -b $i -h -c 1 -S 2 -E
3 -g 4 -R rCRS:1-16569 "$i".bed
VarDictJava/VarDict/teststrandbias.R |
VarDictJava/VarDict/var2vcf_valid.pl -N $i -E -f $AF_THR >
"$i".vardict.vcf;
done
```

- **VarScan2** Koboldt et al published VarScan (in 2009) and VarScan2 (in 2012), cited in total almost 4,000 times, underlining its acceptance in the scientific community. It was shown that for coverage of 1,000x VarScan2 was best in discovering variants present at 1%, compared to somatic variant callers<sup>11</sup>. VarScan2 accepts the pileup file generated from the BAM file with SAMtools<sup>12</sup>. As SAMtools mpileup applies coverage filtering of 8,000x, this parameter needs to be overwritten e.g. (-d 100000) if a coverage of 100,000 should be accepted. Having a mean coverage ~6,000x we did not apply this parameter. The following parameters were used for VarScan2 (version 2.4.4 applied) over all BAM files:

```
for i in *; do
samtools mpileup -B -f reference/rcrs.fasta $i | java -jar
VarScan.v2.4.4.jar mpileup2snp --min-var-freq 0.004 --min-avg-
qual 30 --min-reads 2 5 --min-coverage 10 -output-vcf >
"$i".varscan.vcf;
done
```

As all tools emit VCF files subsequently “bcftools query” can be applied to extract the information about variant position, reference base, alternative base, coverage and allele frequency, such that the tools can be compared. All files were merged and checked manually in LibreOffice, in order to annotate sites to ignore, (around homopolymeric-C stretches 302-309 and 311-15, around the AC repeat at position 523-524 and around 3107 due to the N on the reference sequence, as reported previously). Subsequently the files were analyzed in RStudio, using the reshape2 library, and ggplot2 library for the generation of the figures.

## Calculation of definitions for performance

Performance metrics were calculated according to Weissensteiner *et al.*<sup>1</sup>

**Sensitivity** = number of true positives / (number of true positives + number of false negatives)

**Specificity** = number of true negatives / (number of true negatives + number of false positives)

**Precision** = number of true positives / (number of true positives + number of false positives)

**F1 Score** =  $2 * (\text{Precision} * \text{Sensitivity}) / (\text{Precision} + \text{Sensitivity})$

**Supplementary Table S7.** List of all variants defining the gold-standard. Carrier “H1” and “U5” denote the two samples. “Shared” indicates that the specific variant is present as homoplasmy in the mixture. CLAA = Clontech, Herk = Herkulase, NEB = NEB Taq. “DNA” indicates mixture from total DNA, while PCR indicates that the mixtures were performed on the PCR products. In total 24 mixtures starting from DNA and 12 from PCR products are represented, whereby the numbers indicate the amounts the variant was present. The private low-level variants down to 1% (see comments) were confirmed with HiSeq sequencing. The table additionally lists sites which were ignored for the analysis – either due to issues or too low heteroplasmic levels – not detectable in all mixtures (see comments).

| Pos   | Ref. | Alt. | Carrier | Gold-stand | CIAA DNA | Herk DNA | NEB DNA | CIAA PCR | Herk PCR | NEB PCR | Total Sum | H1 | U5 | Comment                    |
|-------|------|------|---------|------------|----------|----------|---------|----------|----------|---------|-----------|----|----|----------------------------|
| 73    | A    | G    | U5      | Yes        | 8        | 8        | 8       | 4        | 3        | 3       | 34        | 0  | 3  |                            |
| 151   | C    | T    | U5      | Yes        | 7        | 7        | 8       | 4        | 4        | 3       | 33        | 0  | 3  |                            |
| 152   | T    | C    | U5      | Yes        | 8        | 7        | 8       | 4        | 4        | 4       | 35        | 0  | 3  |                            |
| 263   | A    | G    | Shared  | Yes        | 8        | 8        | 8       | 4        | 4        | 4       | 36        | 3  | 3  |                            |
| 477   | T    | C    | H1      | Yes        | 8        | 8        | 8       | 4        | 4        | 4       | 36        | 3  | 0  |                            |
| 750   | A    | G    | Shared  | Yes        | 8        | 8        | 8       | 4        | 4        | 4       | 36        | 3  | 3  |                            |
| 1438  | A    | G    | Shared  | Yes        | 8        | 8        | 8       | 4        | 4        | 4       | 36        | 3  | 3  |                            |
| 2706  | A    | G    | U5      | Yes        | 8        | 8        | 8       | 3        | 4        | 4       | 35        | 0  | 3  |                            |
| 3010  | G    | A    | H1      | Yes        | 8        | 8        | 8       | 4        | 4        | 4       | 36        | 3  | 0  |                            |
| 3197  | T    | C    | U5      | Yes        | 8        | 8        | 8       | 4        | 4        | 4       | 36        | 0  | 3  |                            |
| 3768  | A    | G    | U5      | Yes        | 8        | 8        | 8       | 4        | 4        | 3       | 35        | 0  | 3  |                            |
| 4769  | A    | G    | Shared  | Yes        | 8        | 8        | 8       | 4        | 4        | 4       | 36        | 3  | 3  |                            |
| 5979  | G    | A    | H1      | Yes        | 8        | 8        | 8       | 4        | 4        | 4       | 36        | 3  | 0  |                            |
| 7028  | C    | T    | U5      | Yes        | 8        | 8        | 8       | 3        | 4        | 4       | 35        | 0  | 3  |                            |
| 8860  | A    | G    | Shared  | Yes        | 8        | 8        | 8       | 4        | 4        | 4       | 36        | 3  | 3  |                            |
| 9145  | G    | A    | U5      | Yes        | 8        | 8        | 8       | 4        | 3        | 4       | 35        | 0  | 3  |                            |
| 9462  | T    | C    | H1      | Yes        | 6        | 5        | 6       | 3        | 3        | 3       | 26        | 3  | 0  | H1 private mutation (1.3%) |
| 9477  | G    | A    | U5      | Yes        | 7        | 7        | 8       | 4        | 4        | 4       | 34        | 0  | 3  |                            |
| 11467 | A    | G    | U5      | Yes        | 8        | 7        | 7       | 4        | 3        | 4       | 33        | 0  | 3  |                            |
| 11719 | G    | A    | U5      | Yes        | 8        | 7        | 8       | 4        | 3        | 4       | 34        | 0  | 3  |                            |
| 12308 | A    | G    | U5      | Yes        | 8        | 6        | 8       | 3        | 4        | 4       | 33        | 0  | 3  |                            |
| 12372 | G    | A    | U5      | Yes        | 8        | 7        | 8       | 4        | 4        | 4       | 35        | 0  | 3  |                            |
| 13617 | T    | C    | U5      | Yes        | 8        | 8        | 8       | 4        | 4        | 4       | 36        | 0  | 3  |                            |

|       |   |   |        |        |   |   |   |   |   |   |    |   |   |                               |
|-------|---|---|--------|--------|---|---|---|---|---|---|----|---|---|-------------------------------|
| 14766 | C | T | U5     | Yes    | 7 | 8 | 8 | 3 | 4 | 3 | 33 | 0 | 3 |                               |
| 14793 | A | G | U5     | Yes    | 8 | 8 | 8 | 3 | 4 | 4 | 35 | 0 | 3 |                               |
| 15236 | A | G | H1     | Yes    | 6 | 2 | 7 | 3 | 3 | 3 | 24 | 3 | 0 | H1 private mutation (1.2%)    |
| 15289 | T | C | U5     | Yes    | 8 | 8 | 8 | 4 | 4 | 4 | 36 | 0 | 3 |                               |
| 15326 | A | G | Shared | Yes    | 8 | 8 | 8 | 4 | 4 | 4 | 36 | 3 | 3 |                               |
| 15372 | T | C | U5     | Yes    | 2 | 2 | 2 | 1 | 1 | 1 | 9  | 0 | 3 | U5 private mutation (4%)      |
| 16129 | G | A | H1     | Yes    | 5 | 3 | 2 | 3 | 3 | 3 | 19 | 3 | 0 | H1 private mutation (1%)      |
| 16189 | T | C | U5     | Yes    | 8 | 7 | 8 | 3 | 3 | 4 | 33 | 0 | 3 |                               |
| 16234 | C | T | U5     | Yes    | 7 | 7 | 7 | 3 | 3 | 3 | 30 | 0 | 3 |                               |
| 16256 | C | T | U5     | Yes    | 7 | 6 | 8 | 3 | 4 | 3 | 31 | 0 | 3 |                               |
| 16270 | C | T | U5     | Yes    | 6 | 7 | 6 | 3 | 3 | 3 | 28 | 0 | 3 |                               |
| 16311 | T | C | U5     | Yes    | 8 | 7 | 8 | 4 | 4 | 4 | 35 | 0 | 3 |                               |
| 16362 | T | C | U5     | Yes    | 8 | 8 | 8 | 4 | 3 | 4 | 35 | 0 | 3 |                               |
| 16526 | G | A | U5     | Yes    | 8 | 8 | 8 | 4 | 4 | 4 | 36 | 0 | 3 |                               |
| 310   | T | C | Shared | Ignore | 8 | 8 | 8 | 4 | 4 | 4 | 36 | 3 | 3 | Issues homo-polymeric stretch |
| 513   | G | A | Shared | Ignore | 1 | 0 | 1 | 0 | 0 | 0 | 2  | 0 | 0 | Issues 523-24 AC repeat       |
| 3065  | T | C | H1     | Ignore | 1 | 0 | 2 | 1 | 0 | 1 | 5  | 0 | 0 | Prob ~ 0.5% privat mut        |
| 3106  | C | A |        | Ignore |   |   |   |   |   |   |    |   |   | Reference Issues              |
| 3106  | C | G |        | Ignore |   |   |   |   |   |   |    |   |   | Reference Issues              |
| 3106  | C | T |        | Ignore |   |   |   |   |   |   |    |   |   | Reference Issues              |
| 3107  | N | C |        | Ignore |   |   |   |   |   |   |    |   |   | Reference Issues              |
| 7076  | A | G | H1     | Ignore | 5 | 0 | 5 | 2 | 0 | 3 | 15 | 2 | 0 | Prob 0.8-0.9% privat mut      |
| 11150 | G | A | H1     | Ignore | 1 | 0 | 3 | 1 | 0 | 2 | 7  | 1 | 0 | Prob 0.5% privat mut          |
| 15635 | T | C | H1     | Ignore | 5 | 0 | 3 | 3 | 0 | 2 | 13 | 1 | 0 | Prob 0.8-0.9% privat mut      |

**Supplementary Figure S1.** An example of an agarose-gel for 9 samples using the NEB Taq polymerases, including two negative controls and two positive controls (marked in red and green boxes, respectively).

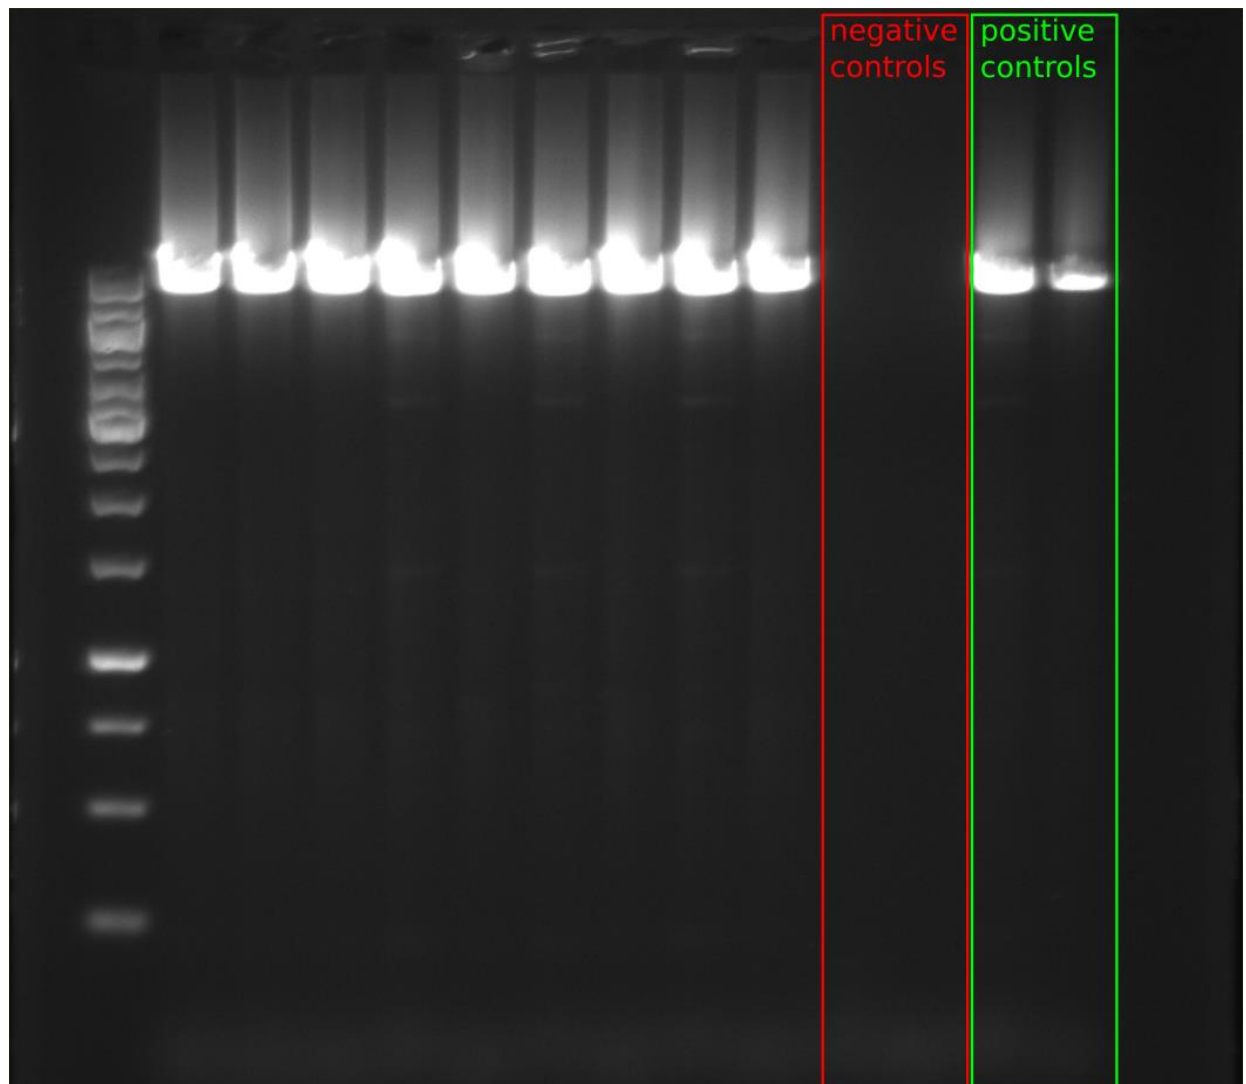

**Supplementary Figure S2.** Nucleotide distribution over all false positive variants. Represented are the nucleobase changes (e.g. AG indicating a change from base A-to-G) for the 1% mixtures (M4). Interestingly most changes are A to G (~34%) and T-to-C (~65%). While C-to-T base changes would be expected far more often, only few exceptions are present. rCRS expected variants are included for comparison.

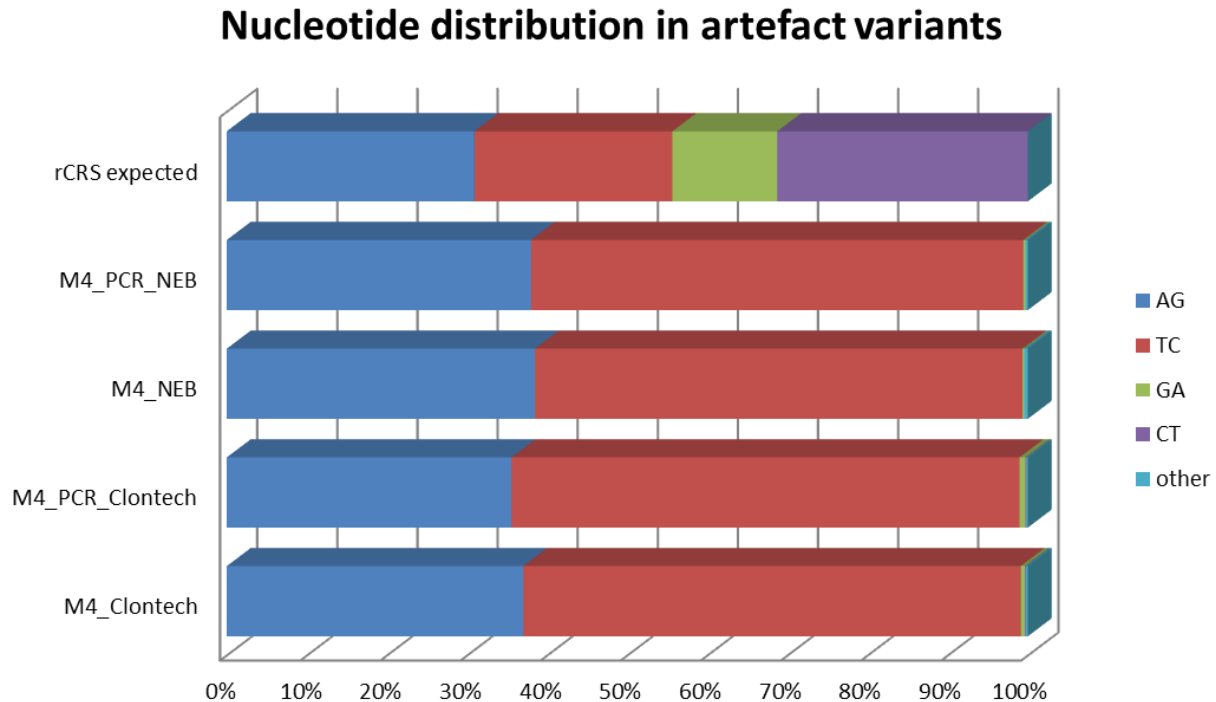

## References

1. Weissensteiner, H. *et al.* mtDNA-Server: next-generation sequencing data analysis of human mitochondrial DNA in the cloud. *Nucleic Acids Res.* **44**, W64–W69 (2016).
2. Wilm, A. *et al.* LoFreq: a sequence-quality aware, ultra-sensitive variant caller for uncovering cell-population heterogeneity from high-throughput sequencing datasets. *Nucleic Acids Res.* **40**, 11189–11201 (2012).
3. Lai, Z. *et al.* VarDict: A novel and versatile variant caller for next-generation sequencing in cancer research. *Nucleic Acids Res.* **44**, (2016).
4. Koboldt, D. C. *et al.* VarScan 2 : Somatic mutation and copy number alteration discovery in cancer by exome sequencing. 568–576 (2012). doi:10.1101/gr.129684.111
5. Garrison, E. & Marth, G. Haplotype-based variant detection from short-read sequencing. (2012). Available at: <http://arxiv.org/abs/1207.3907>. (Accessed: 21st October 2019)
6. McKenna, A. *et al.* The genome analysis toolkit: A MapReduce framework for analyzing next-generation DNA sequencing data. *Genome Res.* **20**, 1297–1303 (2010).

7. Poplin, R. *et al.* Scaling accurate genetic variant discovery to tens of thousands of samples. *bioRxiv* 201178 (2017). doi:10.1101/201178
8. Li, H. Improving SNP discovery by base alignment quality. *Bioinformatics* **27**, 1157–8 (2011).
9. Andrews, R. M. *et al.* Reanalysis and revision of the Cambridge reference sequence for human mitochondrial DNA. *Nature Genetics* **23**, 147 (1999).
10. Li, H. Aligning sequence reads, clone sequences and assembly contigs with BWA-MEM. *3* (2013).
11. Stead, L. F., Sutton, K. M., Taylor, G. R., Quirke, P. & Rabbitts, P. Accurately identifying low-allelic fraction variants in single samples with next-generation sequencing: Applications in tumor subclone resolution. *Hum. Mutat.* **34**, 1432–1438 (2013).
12. Li, H. *et al.* The Sequence Alignment/Map format and SAMtools. *Bioinformatics* **25**, 2078–2079 (2009).
